# Supplementary material for: In Vitro Evaluation of Bioavailability of Cr from Daily Food Rations and Dietary Supplements from the Polish Market
Source: MDPI journal article supplement (doi:10.3390/nu16071022), 2024-03-31
Supplement: s1 [file s1]

## SUPPLEMENTARY FILE

### *In vitro* evaluation of bioavailability of Cr from daily food rations and dietary supplements

Piotr Bawiec<sup>1</sup>, Jan Sawicki<sup>2</sup>, Paulina Łasińska-Pracuta<sup>1</sup>, Marcin Czop<sup>3</sup>, Ireneusz Sowa<sup>2</sup>, Paweł Helon<sup>4</sup>, Karolina Pietrzak<sup>1</sup> and Wojciech Koch<sup>1,\*</sup>

<sup>1</sup> Department of Food and Nutrition, Medical University of Lublin, 4a Chodźki Str., 20-093 Lublin, Poland; piotr.bawiec@wp.pl (P.B.); paulia\_lasinska@interia.pl (P.Ł.-P.); karolinapietrzak94@gmail.com (K.P.)

<sup>2</sup> Department of Analytical Chemistry, Medical University of Lublin, 4a Chodźki Str., 20-093 Lublin, Poland; jan.sawicki@umlub.pl (J.S.); ireneusz.sowa@umlub.pl (I.S.)

<sup>3</sup> Department of Clinical Genetics, Medical University of Lublin, Radziwiłłowska 11 Str., 20-080 Lublin, Poland; marcin.czop@umlub.pl (M.C.)

<sup>4</sup> Branch in Sandomierz, Jan Kochanowski University of Kielce, Schinzla 13a Str., 27-600, Sandomierz, Poland; phelon@ujk.edu.pl (P.H.)

\* Correspondence: kochw@interia.pl; Tel.: +48-81-448-7142

**Table S1.** Composition of diets used in the study [30].

| Type of the meal  | Food product/meal             | Amount (g/mL) |
|-------------------|-------------------------------|---------------|
| <b>Basic diet</b> |                               |               |
| Breakfast         | cereal coffee with milk       | 250           |
|                   | white bread                   | 80            |
|                   | cottage cheese                | 110           |
|                   | Onion                         | 10            |
|                   | cucumber                      | 30            |
|                   | butter                        | 10 g          |
| Second breakfast  | mixed bread (wheat-rye flour) | 60            |
|                   | chicken pate                  | 130           |

|                      |                                                                  |                          |
|----------------------|------------------------------------------------------------------|--------------------------|
|                      | apple                                                            | 150                      |
|                      | black tea infusion                                               | 250                      |
| Lunch                | vegetable soup (including carrots, celery, parsley, cauliflower) | 400 (vegetables – 100 g) |
|                      | poultry chop                                                     | 150                      |
|                      | potatoes                                                         | 300                      |
|                      | red cabbage salad                                                | 150                      |
|                      | grated strawberry compote                                        | 250 (strawberries -30 g) |
| Dinner               | meatballs in sauce                                               | 120                      |
|                      | pasta                                                            | 120                      |
|                      | salad (carrot, apple, mayonnaise)                                | 100                      |
|                      | yeast cake with crumble                                          | 50                       |
|                      | black tea infusion with milk                                     | 250                      |
| <b>Standard diet</b> |                                                                  |                          |
| Breakfast            | ham sausages                                                     | 150                      |
|                      | mixed bread (wheat-rye flour)                                    | 90                       |
|                      | cocoa with milk                                                  | 250                      |
|                      | mustard                                                          | 20                       |

|                          |                               |                                   |
|--------------------------|-------------------------------|-----------------------------------|
| Second breakfast         | gouda cheese                  | 60                                |
|                          | crispbread                    | 30                                |
|                          | coffee infusion with milk     | 150                               |
| Lunch                    | tomato soup with pasta        | 400                               |
|                          | Potatoes                      | 300                               |
|                          | grilled cod                   | 200                               |
|                          | salad with sauerkraut         | 150                               |
|                          | compote                       | 250                               |
|                          | coffee infusion with milk     | 150                               |
|                          | milk chocolate with nuts      | 30                                |
| Dinner                   | mixed bread (wheat-rye flour) | 80                                |
|                          | sausages                      | 110                               |
|                          | pickled cucumber              | 80                                |
|                          | black tea infusion            | 250                               |
| <b>High-residue diet</b> |                               |                                   |
| Breakfast                | oatmeal in milk               | oat flakes – 50 g<br>milk – 350 g |
|                          | wholemeal bread               | 80                                |

|                  |                                                                             |                                                                          |
|------------------|-----------------------------------------------------------------------------|--------------------------------------------------------------------------|
|                  | cottage cheese                                                              | 80                                                                       |
|                  | jam                                                                         | 20                                                                       |
| Second breakfast | mixed bread (wheat-rye flour)                                               | 80                                                                       |
|                  | rennet cheese                                                               | 40                                                                       |
|                  | ham                                                                         | 440                                                                      |
|                  | tomatoes                                                                    | 150                                                                      |
|                  | banana                                                                      | 100                                                                      |
|                  | black tea infusion                                                          | 250                                                                      |
| Lunch            | beetroot soup                                                               | 400 (beetroot – 30 g;<br>vegetables: carrots, parsley,<br>celery – 25 g) |
|                  | pork chop                                                                   | 150                                                                      |
|                  | potatoes                                                                    | 300                                                                      |
|                  | boiled vegetables (carrots with<br>peas 1+1 with breadcrumbs<br>and butter) | 300                                                                      |
|                  | apple                                                                       | 150                                                                      |
|                  | strawberry compote                                                          | 200                                                                      |
| Dinner           | mixed bread (wheat-rye flour)                                               | 80                                                                       |
|                  | chicken ham                                                                 | 80                                                                       |

|  |                           |      |
|--|---------------------------|------|
|  | red pepper                | 150  |
|  | butter                    | 10 g |
|  | coffee infusion with milk | 150  |

**Table S2.** Selected nutritional parameters of diets used in the study [30].

| Parameter         | Diet                |                    |                    |
|-------------------|---------------------|--------------------|--------------------|
|                   | Basic               | Standard           | High-residue       |
| Proteins (g)      | 116.8 (17.3% of E*) | 153.9 (22.2% of E) | 143.5 (18.5% of E) |
| Fats (g)          | 109.2 (36.4% of E)  | 129 (41.9% of E)   | 117.1 (34% of E)   |
| Carbohydrates (g) | 338 (46.3% of E)    | 272.2 (35.8% of E) | 416 (47.5% of E)   |
| Fiber (g)         | 28.6                | 24.6               | 50.2               |
| Vitamin A (µg)    | 2960                | 500                | 4600               |
| Vitamin C (µg)    | 80.6                | 54.8               | 304.7              |
| Vitamin E (mg)    | 17.2                | 15.9               | 24.7               |
| Calcium (mg)      | 568.7               | 1203               | 1465               |
| Sodium (mg)       | 2370                | 4865               | 3290               |
| Potassium (mg)    | 4877                | 5615               | 6837               |
| Magnesium (mg)    | 361                 | 562.9              | 693                |
| Iron (mg)         | 14.3                | 17.2               | 21.7               |
| Energy (kcal)     | 2699                | 2770               | 3099               |
| Total weight (g)  | 2970                | 2750               | 3285               |

\* Percentage of energy

**Table S3.** Operating parameters in the ICP-OES method.

|                               |                         |
|-------------------------------|-------------------------|
| Analytical line, reading time | Se 267.716 nm, 3 s      |
| Signal reading type           | axial                   |
| Signal integration            | 3 pix                   |
| Plasma generator power        | 1300 W                  |
| Coolant gas flow rate         | 14 L·min <sup>-1</sup>  |
| Auxiliary gas flow rate       | 0.5 L·min <sup>-1</sup> |
| Carrier gas flow rate         | 0.6 L·min <sup>-1</sup> |
| Sample flow rate              | 1.0 L·min <sup>-1</sup> |

**Table S4.** Operating parameters in the GF-AAS method.

|                                                             |                    |
|-------------------------------------------------------------|--------------------|
| Analytical line, reading time                               | Cr 357.869 nm, 5 s |
| Time and temperature program for graphite furnace operation |                    |
| drying                                                      | 80°C, 20 s         |
| drying                                                      | 90°C, 20 s         |
| drying                                                      | 110°C, 10 s        |
| pyrolysis                                                   | 350°C, 20 s        |
| pyrolysis                                                   | 1300°C, 10 s       |
| atomization                                                 | 2400°C, 5 s        |
| cleaning                                                    | 2600°C, 4 s        |
| Matrix modifier                                             | 0.05% Mg, 5 µL     |
| Signal integration                                          | 3 pix              |
| Sample volume                                               | 20 µL              |
